# Ultrasound-guided Medial Branch Blocks, Facet Joint, and Multifidus Muscle Injections

## How It Is Done under One Needle Insertion Point!

Carl P. C. Chen, M.D., Ph.D., Jean-Lon Chen, M.D., Ph.D., Chan-Shien Ho, M.D., Areerat Suputtitada, M.D.

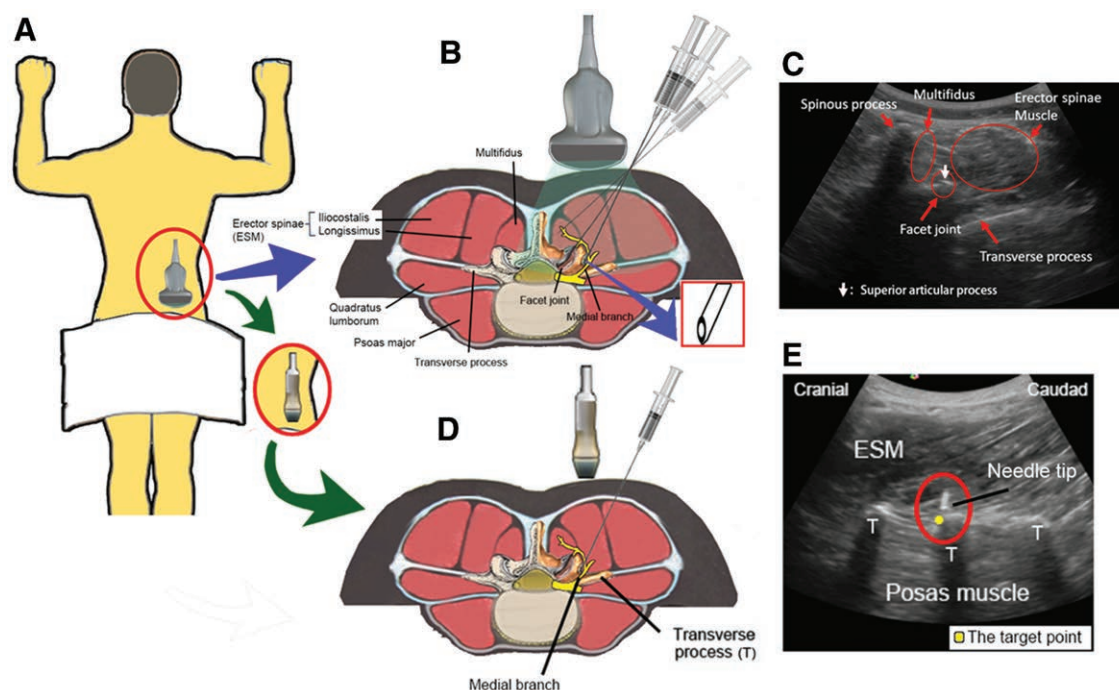

Lumbar facet joint injections and medial branch blocks can be performed under computed tomography guidance.<sup>1</sup> Musculoskeletal ultrasound has been shown to be an accurate guiding tool in performing these procedures as well.<sup>2</sup> Song *et al.* have suggested that the lumbar multifidus muscle can be injected under ultrasound guidance in an out-of-plane approach.<sup>3</sup> No publication has shown how to perform ultrasound-guided lumbar medial branch block, facet joint, and multifidus muscle injections under one needle insertion point. With the patient placed in a prone position and a pillow under the abdomen, a low-frequency curvilinear transducer is placed in a transverse plane to obtain the transverse paravertebral sonogram of the low back (*images A and C*).

Using the in-plane technique, the needle is inserted at an angle of about 45° to 60° to the skin, and in a lateral to

medial direction. For medial branch block, the needle is directed to the bottom of the groove between the lateral surface of the superior articular process and the cephalad margin of the respective transverse process (*image B*; Supplemental Digital Content, <http://links.lww.com/ALN/C104>). Once bony contact is felt, the transducer is then rotated 90° clockwise to obtain the longitudinal paravertebral sonogram to confirm that the needle tip is at the cranial edge of the transverse process<sup>2</sup> (*images D and E*; Supplemental Digital Content, <http://links.lww.com/ALN/C104>). After medial branch block, the transducer is then rotated counterclockwise back to the transverse plane. With adjustment of needle depth and bevel angle accordingly, further in-plane injections to the facet joint and multifidus muscle can be done (*image B*; Supplemental Digital Content, <http://links.lww.com/ALN/C104>).

This article has been selected for the Anesthesiology CME Program. Learning objectives and disclosure and ordering information can be found in the CME section at the front of this issue. Supplemental Digital Content is available for this article. Direct URL citations appear in the printed text and are available in both the HTML and PDF versions of this article. Links to the digital files are provided in the HTML text of this article on the Journal's Web site ([www.anesthesiology.org](http://www.anesthesiology.org)).

Published online first on October 31, 2019. From the Department of Physical Medicine and Rehabilitation, Chang Gung Memorial Hospital at Linkou and College of Medicine, Chang Gung University, Guishan District, Taoyuan City, Taiwan (C.P.C.C., J.-L.C., C.-S.H.), and the Department of Rehabilitation Medicine, Faculty of Medicine, Chulalongkorn University, Bangkok, Thailand (A.S.).

Copyright © 2019, the American Society of Anesthesiologists, Inc. All Rights Reserved. Anesthesiology 2020; 132:582–3. DOI: 10.1097/ALN.0000000000003043

## Competing Interests

The authors declare no competing interests.

## Correspondence

Address correspondence to Dr. J.-L. Chen: bigmacpaper@gmail.com

## References

1. Gossner J: The lumbar multifidus muscles are affected by medial branch interventions for facet joint syndrome: Potential problems and proposal of a pericapsular infiltration technique. *AJNR Am J Neuroradiol* 2011; 32:E213
2. Greher M, Kirchmair L, Enna B, Kovacs P, Gustorff B, Kapral S, Moriggl B: Ultrasound-guided lumbar facet nerve block: Accuracy of a new technique confirmed by computed tomography. *ANESTHESIOLOGY* 2004; 101:1195–200
3. Song L, Ying S, Wang Z, Yuan X: Ultrasound-guided lumbar multifidus block provides effective postoperative analgesia for lumbar spine surgery. *J Clin Anesth* 2018; 46:116–7
